# Supplementary material for: The Synthesis and Biological Activity of Organotin Complexes with Thio-Schiff Bases Bearing Phenol Fragments
Source: MDPI journal article supplement (doi:10.3390/ijms24098319), 2023-05-05
Supplement: s1 [file s1]

## Supplementary Information

### Synthesis and Biological Activity of Organotin Complexes with thio-Schiff bases bearing Phenol Fragments

Ivan V. Smolyaninov, Andrey I. Poddel'sky, Daria A. Burmistrova, Yulia K. Voronina, Nadezhda P. Pomortseva, Maria A. Polovinkina, Nailya R. Almyasheva, Kristina S. Simeonova, Nadezhda T. Berberova and Igor L. Eremenko

#### Content:

|                                                                                                |   |   |   |   |   |
|------------------------------------------------------------------------------------------------|---|---|---|---|---|
| Figure S1. $^1\text{H}$ NMR spectrum of <b>1</b> ( $\text{CDCl}_3$ , 400 MHz)                  | . | . | . | . | 2 |
| Figure S2. $^{13}\text{C}$ NMR spectrum of <b>1</b> ( $\text{CDCl}_3$ , 100 MHz)               | . | . | . | . | 2 |
| Figure S3. $^1\text{H}$ NMR spectrum of <b>2</b> ( $\text{CDCl}_3$ , 400 MHz)                  | . | . | . | . | 3 |
| Figure S4. $^{13}\text{C}$ NMR spectrum of <b>2</b> ( $\text{CDCl}_3$ , 100 MHz)               | . | . | . | . | 3 |
| Figure S5. $^1\text{H}$ NMR spectrum of <b>3</b> ( $\text{CDCl}_3$ , 400 MHz)                  | . | . | . | . | 4 |
| Figure S6. $^{13}\text{C}$ NMR spectrum of <b>3</b> ( $\text{CDCl}_3$ , 100 MHz)               | . | . | . | . | 4 |
| Figure S7. $^1\text{H}$ NMR spectrum of <b>4</b> ( $\text{CDCl}_3$ , 400 MHz)                  | . | . | . | . | 5 |
| Figure S8. $^{13}\text{C}$ NMR spectrum of <b>4</b> ( $\text{CDCl}_3$ , 100 MHz)               | . | . | . | . | 5 |
| Figure S9. $^1\text{H}$ NMR spectrum of <b>5</b> ( $\text{CDCl}_3$ , 400 MHz)                  | . | . | . | . | 6 |
| Figure S10. $^{13}\text{C}$ NMR spectrum of <b>5</b> ( $\text{CDCl}_3$ , 100 MHz)              | . | . | . | . | 6 |
| Figure S11. $^1\text{H}$ NMR spectrum of <b>L<sup>2</sup>H</b> ( $\text{CDCl}_3$ , 400 MHz)    | . | . | . | . | 7 |
| Figure S12. $^{13}\text{C}$ NMR spectrum of <b>L<sup>2</sup>H</b> ( $\text{CDCl}_3$ , 100 MHz) | . | . | . | . | 7 |

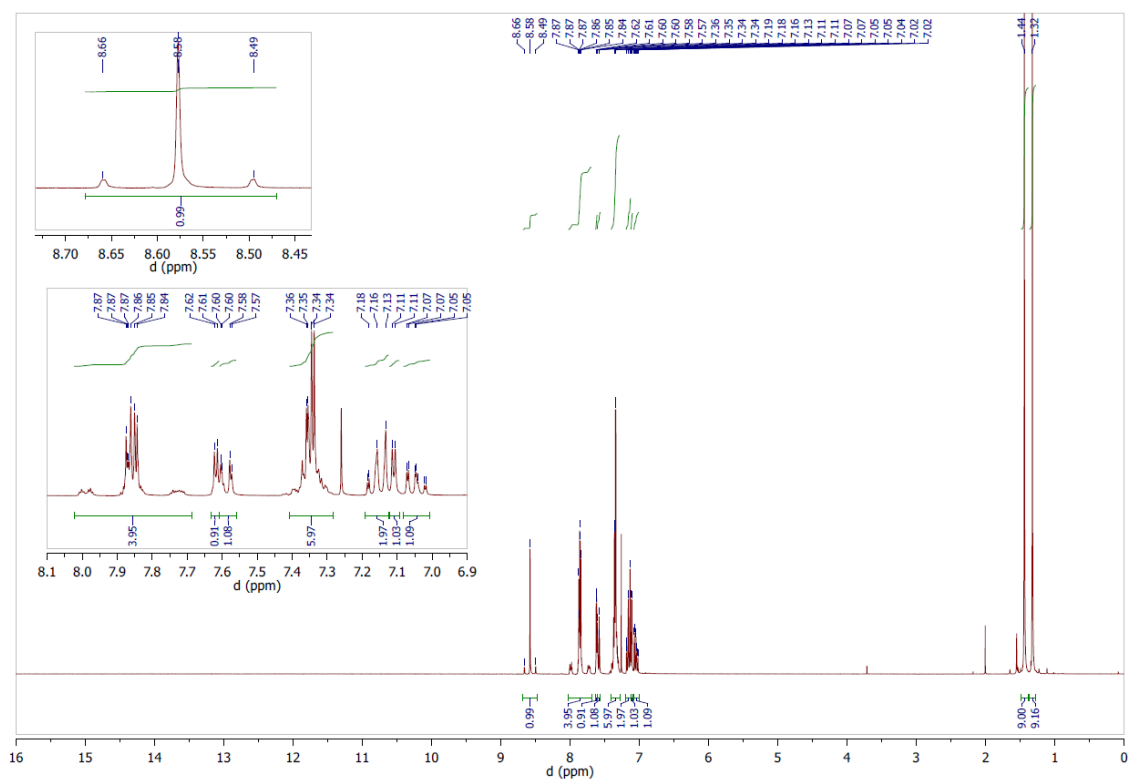

**Figure S1.** <sup>1</sup>H NMR spectrum of **1** (CDCl<sub>3</sub>, 400 MHz)

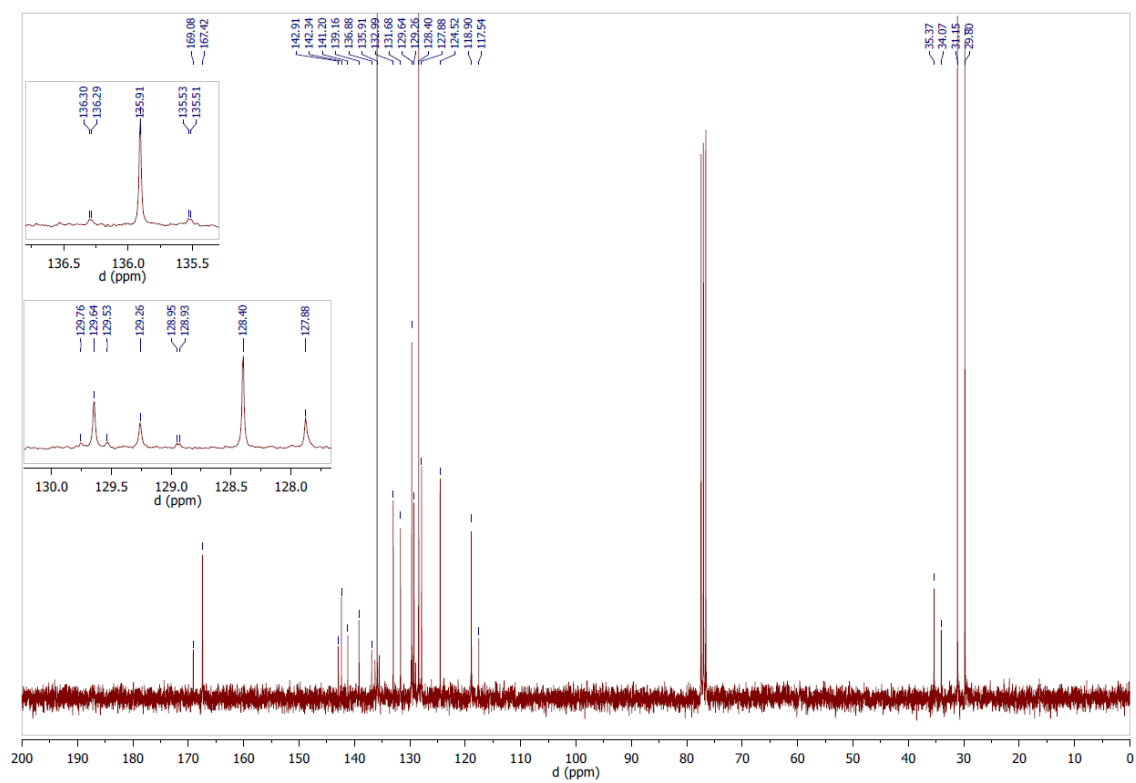

**Figure S2.** <sup>13</sup>C NMR spectrum of **1** (CDCl<sub>3</sub>, 100 MHz)



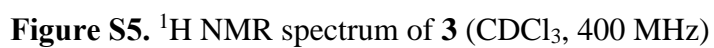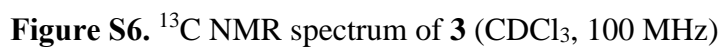

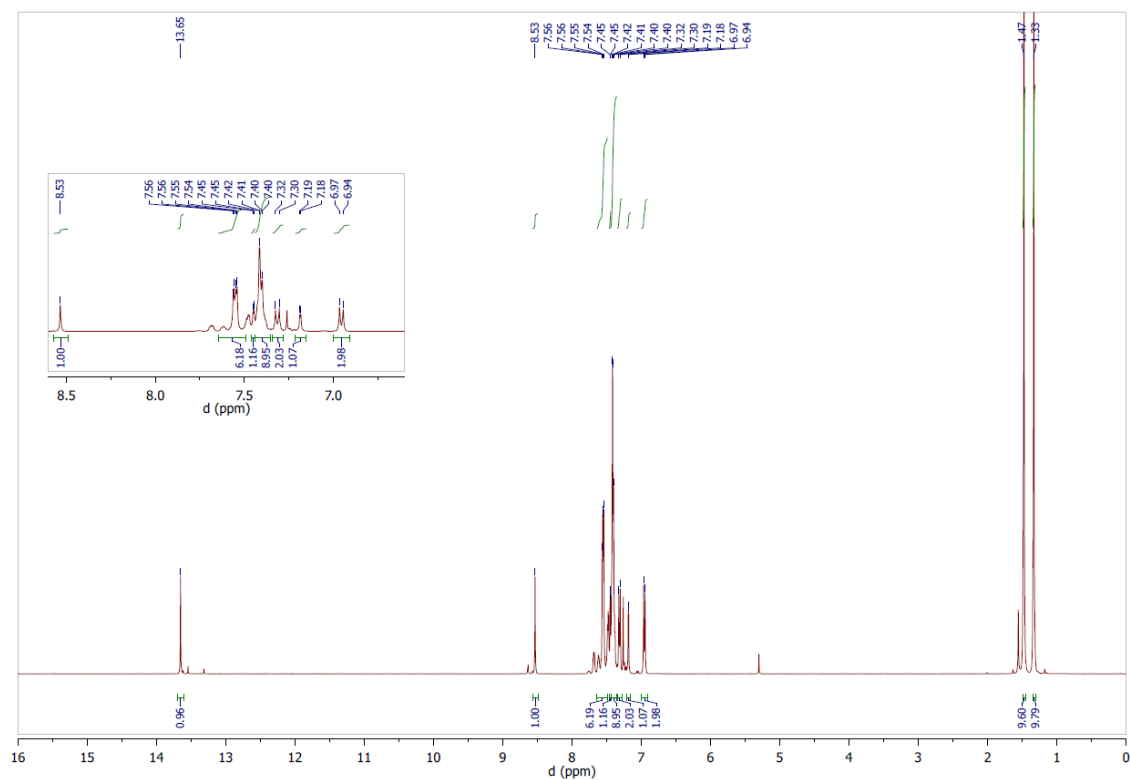

**Figure S7.** <sup>1</sup>H NMR spectrum of **4** (CDCl<sub>3</sub>, 400 MHz)

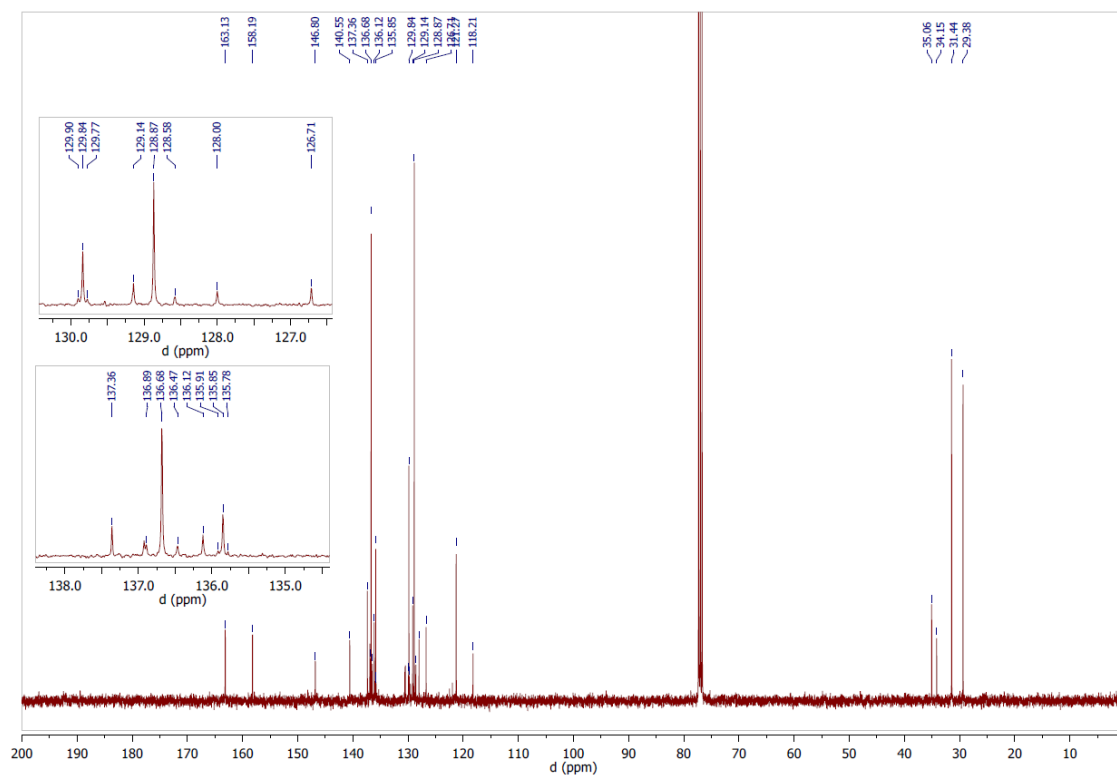

**Figure S8.** <sup>13</sup>C NMR spectrum of **4** (CDCl<sub>3</sub>, 100 MHz)

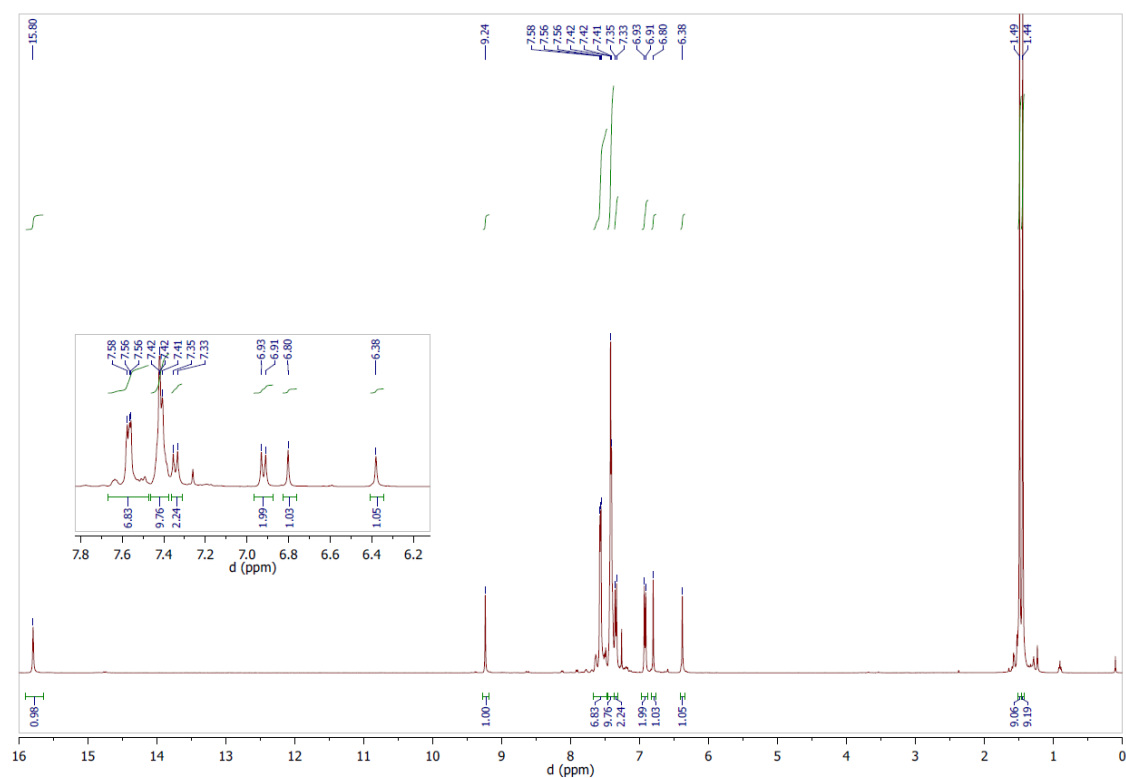

**Figure S9.** <sup>1</sup>H NMR spectrum of **5** (CDCl<sub>3</sub>, 400 MHz)

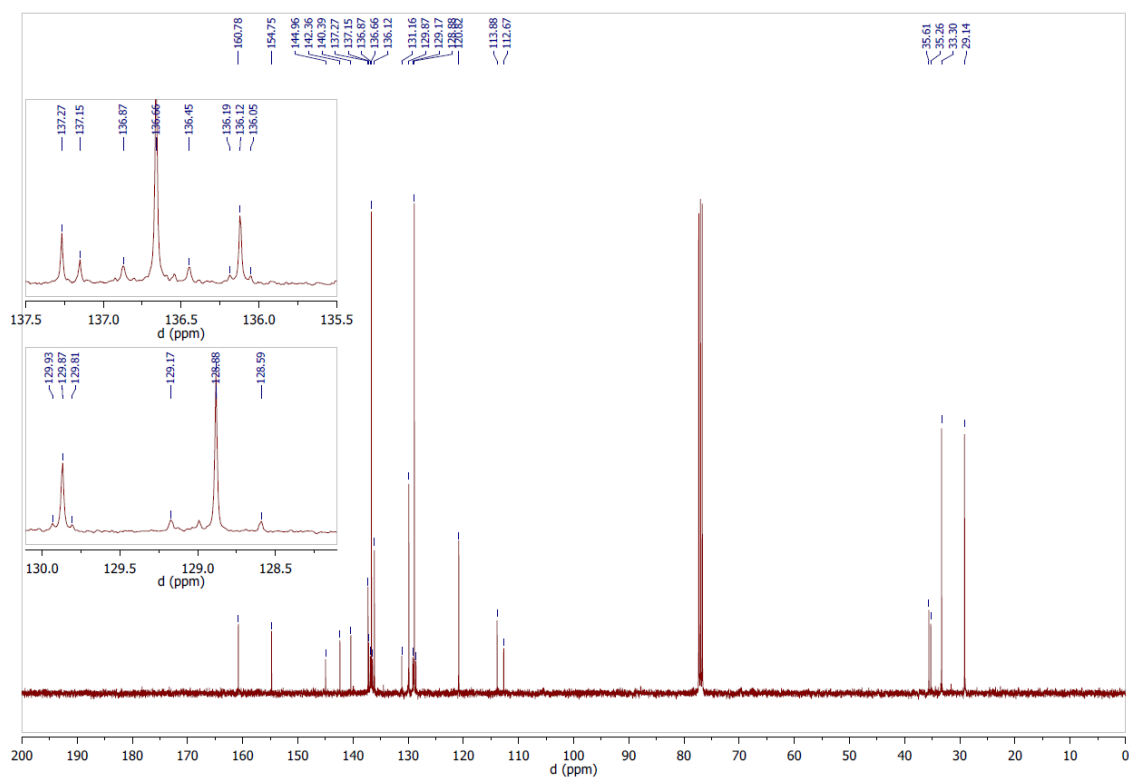

**Figure S10.** <sup>13</sup>C NMR spectrum of **5** (CDCl<sub>3</sub>, 100 MHz)

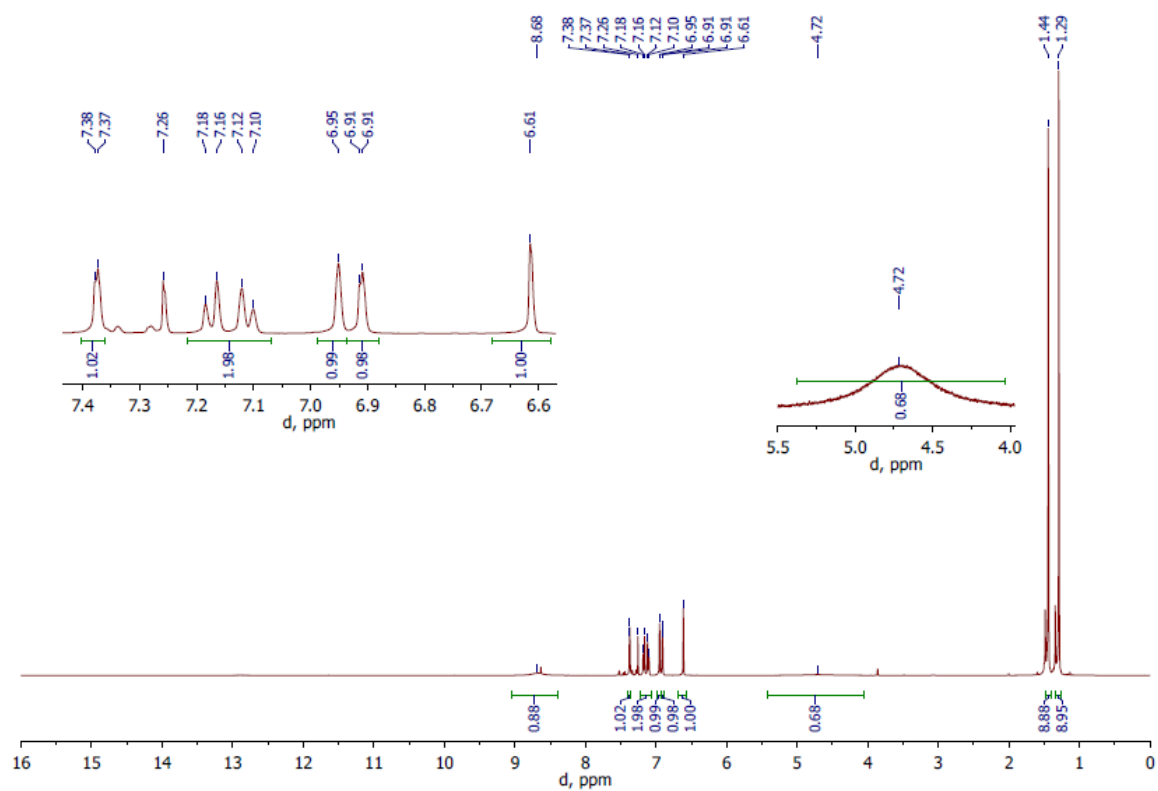

**Figure S11.** <sup>1</sup>H NMR spectrum of **L<sup>2</sup>H** (CDCl<sub>3</sub>, 400 MHz)

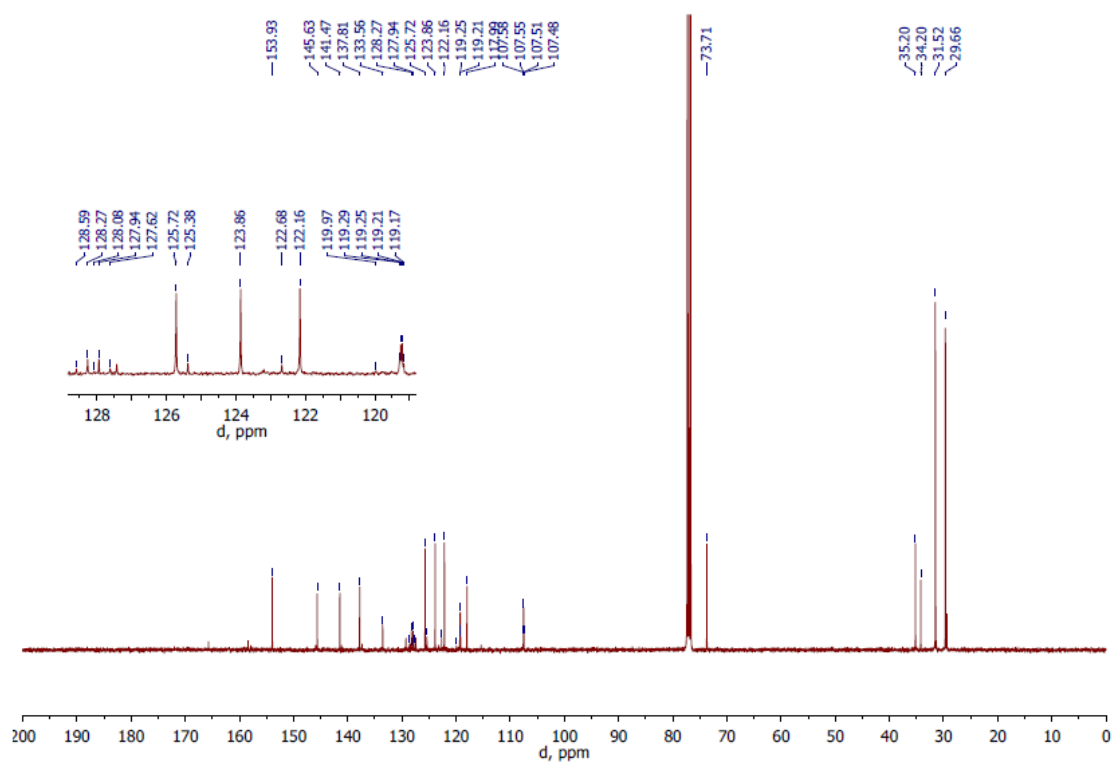

**Figure S12.** <sup>13</sup>C NMR spectrum of **L<sup>2</sup>H** (CDCl<sub>3</sub>, 100 MHz)
